# Supplementary material
Source: PubMed Central journal article supplement (PMC3492551)
Supplement: NIHMS403399-supplement-1.pdf [file NIHMS403399-supplement-1.pdf]

# **Association of UHRF1 with H3K9 methylation directs the maintenance of DNA methylation**

**Scott B. Rothbart<sup>1,2</sup>, Krzysztof Krajewski<sup>1</sup>, Nataliya Nady<sup>3,4,5</sup>, Wolfram Tempel<sup>6</sup>, Sheng Xue<sup>6</sup>,  
Aimee I. Badeaux<sup>7</sup>, Dalia Barsyte-Lovejoy<sup>6</sup>, Jorge Y. Martinez<sup>1</sup>, Mark T. Bedford<sup>7</sup>, Stephen M.  
Fuchs<sup>8</sup>, Cheryl H. Arrowsmith<sup>3,4,5,6</sup>, and Brian D. Strahl<sup>1,2</sup>**

<sup>1</sup>Department of Biochemistry & Biophysics, University of North Carolina at Chapel Hill, Chapel Hill, NC, USA. <sup>2</sup>Lineberger Comprehensive Cancer Center, University of North Carolina at Chapel Hill, Chapel Hill, NC, USA. <sup>3</sup>Ontario Cancer Institute, University of Toronto, Toronto, Canada. <sup>4</sup>Campbell Family Cancer Research Institute, University of Toronto, Toronto, Canada. <sup>5</sup>Department of Medical Biophysics, University of Toronto, Toronto, Canada. <sup>6</sup>Structural Genomics Consortium, University of Toronto, Toronto, Canada. <sup>7</sup>The University of Texas M.D. Anderson Cancer Center, Science Park-Research Division, Smithville, Texas, USA. <sup>8</sup>Department of Biology, Tufts University, Medford, MA, USA.

## **SUPPLEMENTARY INFORMATION**

Supplementary Figure 1 – Peptide array binding profiles for H3K9 methyl effectors.

Supplementary Figure 2 – Cell synchronization, antibody characterization, and validation of UHRF1 knockdown.

Supplementary Figure 3 – Nucleotide sequence of the IGS-rDNA locus amplicon for bisulfite sequencing.

Supplementary Figure 4 – DNMT1 stability is dependent on mitotic binding of UHRF1 to H3K9 methylation and is independent of ubiquitin ligase function.

Supplementary Table 1 – List of Peptides

**a**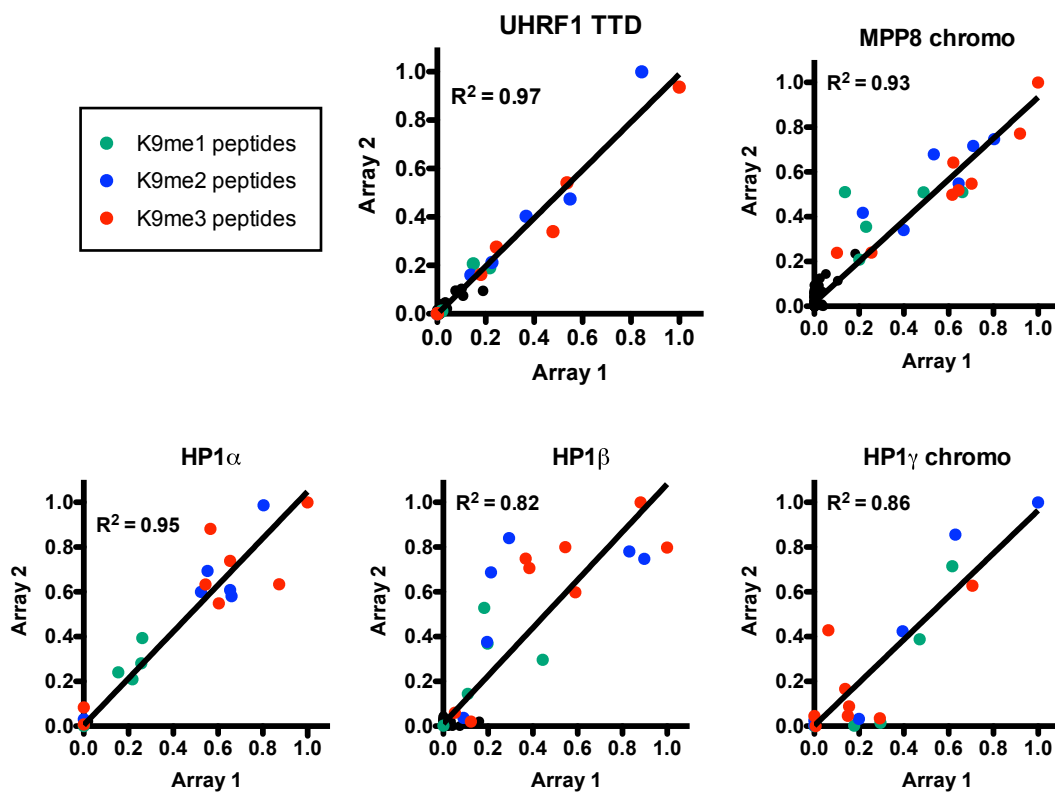**b**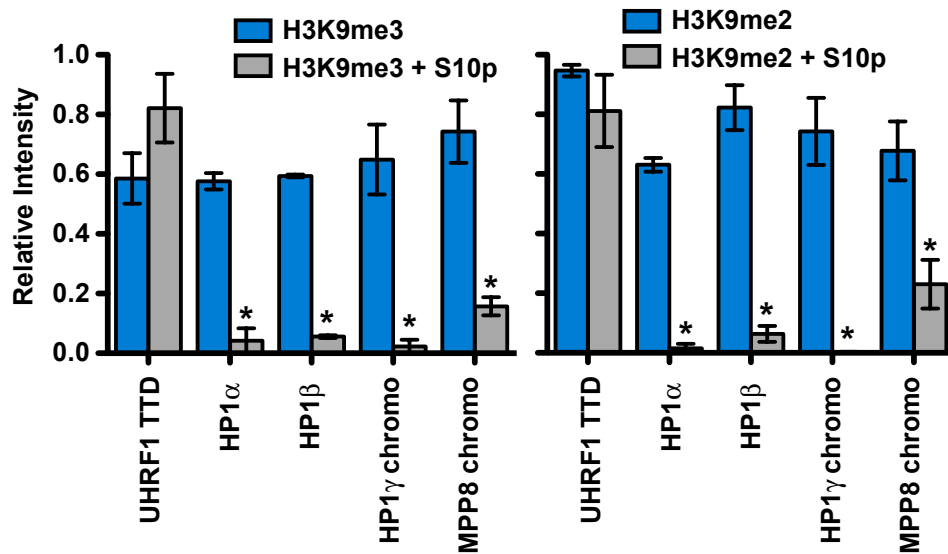**c**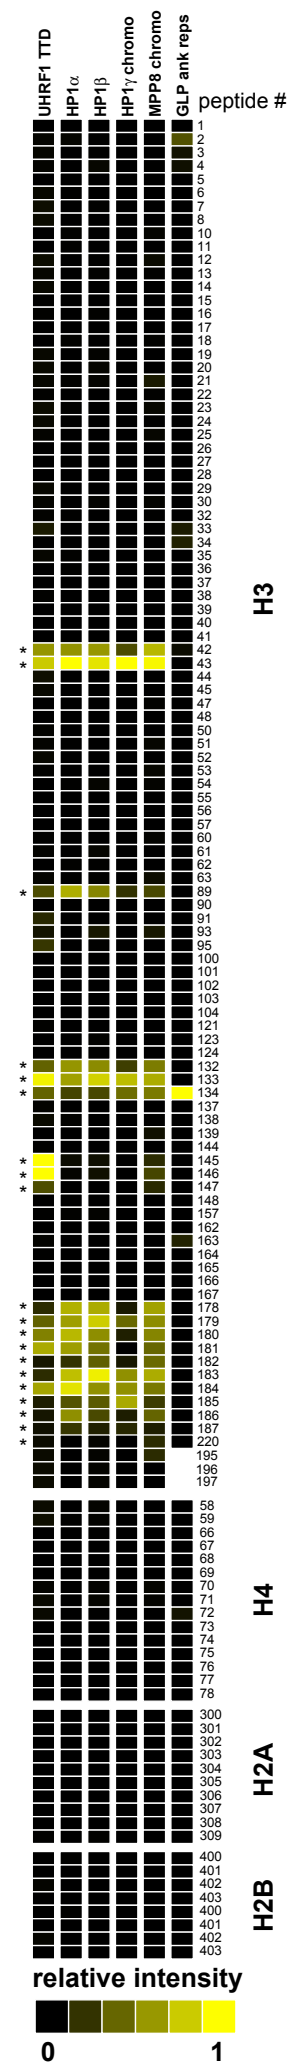

### Supplementary Figure 1: Peptide array binding profiles for H3K9 methyl effectors.

(a) Scatter plots comparing binding profiles of the indicated H3K9 methyl effector proteins or domains on two arrays. H3K9me1-containing peptides are in green, K9me2-containing peptides in blue, H3K9me3-containing peptides in red, and all other peptides on the array are in black. Correlation coefficients were determined by linear regression analysis using GraphPad Prism v5. (b) Bar graph depicting array results for H3K9me2 and me3 phospho/methyl switch sensitivity. Error is represented as  $\pm$  s.e.m. and significance within a sample group was determined by two-way ANOVA (\*  $p < 0.05$ ). (c) Full array results for H3K9 methyl effectors. Peptide numbers correspond to Supplementary Table 1. \* deliniates H3K9 methylated peptides.

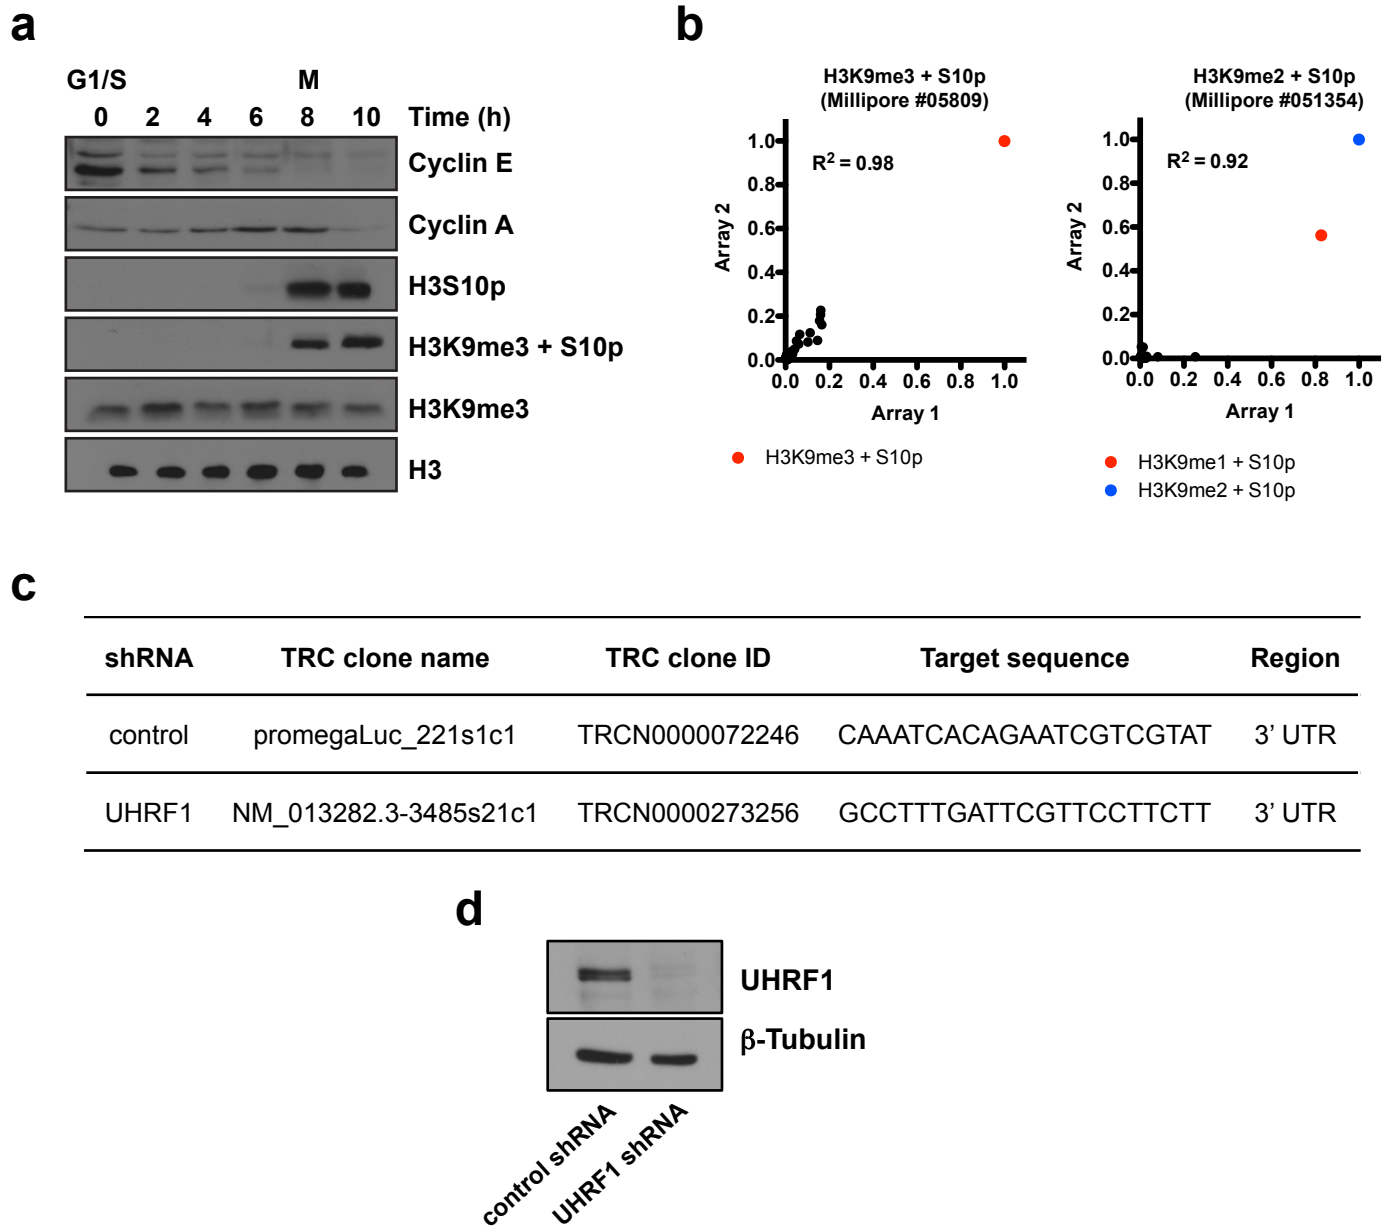

**Supplementary Figure 2: Cell synchronization, antibody characterization, and validation of UHRF1 knockdown.** (a) Western blot analysis of whole-cell protein extracts from HeLa cells at the indicated time points following release from double thymidine block. (b) Scatter plots comparing binding profiles of the indicated dual histone PTM antibodies on two arrays. Correlation coefficients were determined by linear regression analysis using GraphPad Prism v5. (c) shRNA clone information. (d) Western blot validating shRNA knockdown of UHRF1 in HeLa cells.

Intergenic Spacer of the rDNA locus (IGS-rDNA):

GenBank: U13369.1

225 **GAGGGGCATTTTCAGACTTTTCTCT**CGGTCA**CGTGTGGCGT**  
CCGTACTTCTCCTATTTCC**CGATAAGTCTCCTCGACTTCAACATAAACTGTTAAGGC**CG  
GA**CGCCAACA**CG**CGAAACCCCGTCTCTACTAAAAATACAAAGCTGAGT**CGGGAG**CGGTG**  
GGCAGGCCCTGTAATGCCAGCTCCT**CGGGAGGCTGAGGCGGGAGAATCGCTTGAACCAG**  
GGAAG**CGGAGGCTGCAGGGAGCGGAGATCGCG**CCACTGCACTA**CGGCCAGGCTGTAGAG**  
**TGAGTGAGA**

**Supplementary Figure 3: Nucleotide sequence of the IGS-rDNA locus amplicon for bisulfite sequencing.**  
CpG dinucleotides are highlighted in red, and annealing sites for sense and antisense primers are in bold.



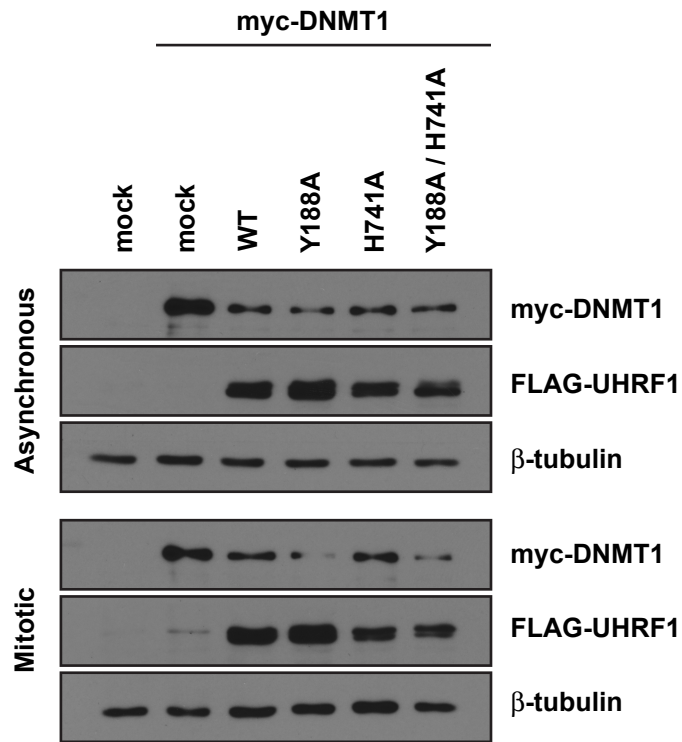

**Supplementary Figure 4: DNMT1 stability is dependent on mitotic binding of UHRF1 to H3K9 methylation and is independent of ubiquitin ligase function.** Western blot on UHRF1 KD HeLa soluble protein extracts transfected with DNMT1 and the indicated UHRF1 construct for 48 hours. DMSO (asynchronous) or nocodazole (mitotic) was added as described in Methods.

**Supplementary Table 1. List of Peptides**

| Peptide # | Sequence                                                                                               | annotation                                     |
|-----------|--------------------------------------------------------------------------------------------------------|------------------------------------------------|
| 1         | H3 1-20 ARTKQTARKSTGGKAPRKQL-K(Biot)-NH <sub>2</sub>                                                   | H3 (1-20)                                      |
| 2         | H3 1-20 ARTKQTARKSTGGK(Ac)APRKQL-K(Biot)-NH <sub>2</sub>                                               | H3K14ac                                        |
| 3         | H3 1-20 ARTKQTARK(Ac)STGGKAPRKQL-K(Biot)-NH <sub>2</sub>                                               | H3K9ac                                         |
| 4         | H3 1-20 ARTK(Ac)QTARKSTGGKAPRKQL-K(Biot)-NH <sub>2</sub>                                               | H3K4ac                                         |
| 5         | H3 1-20 ARTK(Ac)QTARKSTGGK(Ac)APRKQL-K(Biot)-NH <sub>2</sub>                                           | H3K4ac + K14ac                                 |
| 6         | H3 1-20 ARTKQTARK(Ac)STGGK(Ac)APRKQL-K(Biot)-NH <sub>2</sub>                                           | H3K9ac + K14ac                                 |
| 7         | H3 1-20 ARTK(Ac)QTARK(Ac)STGGKAPRKQL-K(Biot)-NH <sub>2</sub>                                           | H3K4ac + K9ac                                  |
| 8         | H3 1-20 ARTK(Ac)QTARK(Ac)STGGK(Ac)APRKQL-K(Biot)-NH <sub>2</sub>                                       | H3K4ac + K9ac + K14ac                          |
| 10        | H3 1-20 ARTKQTARKSTGGKAPRK(Ac)QL-K(Biot)-NH <sub>2</sub>                                               | H3K18ac                                        |
| 11        | H3 1-20 ARTKQTARKSTGGK(Ac)APRK(Ac)QL-K(Biot)-NH <sub>2</sub>                                           | H3K14ac + K18ac                                |
| 12        | H3 1-20 ARTKQTARK(Ac)STGGKAPRK(Ac)QL-K(Biot)-NH <sub>2</sub>                                           | H3K9ac + K18ac                                 |
| 13        | H3 1-20 ARTK(Ac)QTARKSTGGKAPRK(Ac)QL-K(Biot)-NH <sub>2</sub>                                           | H3K4ac + K18ac                                 |
| 14        | H3 1-20 ARTKQTARK(Ac)STGGK(Ac)APRK(Ac)QL-K(Biot)-NH <sub>2</sub>                                       | H3K9ac + K14ac + K18ac                         |
| 15        | H3 1-20 ARTK(Ac)QTARKSTGGK(Ac)APRK(Ac)QL-K(Biot)-NH <sub>2</sub>                                       | H3K4ac + K14ac + K18ac                         |
| 16        | H3 1-20 ARTK(Ac)QTARK(Ac)STGGKAPRK(Ac)QL-K(Biot)-NH <sub>2</sub>                                       | H3K4ac + K9ac + K18ac                          |
| 17        | H3 1-20 ARTK(Ac)QTARK(Ac)STGGK(Ac)APRK(Ac)QL-K(Biot)-NH <sub>2</sub>                                   | H3K4ac + K9ac + K14ac + K18ac                  |
| 18        | H3 1-20 ARTK(Me <sub>3</sub> )QTARKSTGGKAPRKQL-K(Biot)-NH <sub>2</sub>                                 | H3K4me3                                        |
| 19        | H3 1-20 ARTK(Me <sub>3</sub> )QTARK(Ac)STGGKAPRKQL-K(Biot)-NH <sub>2</sub>                             | H3K4me3 + K9ac                                 |
| 20        | H3 1-20 ARTK(Me <sub>3</sub> )QTARKSTGGK(Ac)APRKQL-K(Biot)-NH <sub>2</sub>                             | H3K4me3 + K14ac                                |
| 21        | H3 1-20 ARTK(Me <sub>3</sub> )QTARKSTGGKAPRK(Ac)QL-K(Biot)-NH <sub>2</sub>                             | H3K4me3 + K18ac                                |
| 22        | H3 1-20 ARTK(Me <sub>3</sub> )QTARK(Ac)STGGK(Ac)APRKQL-K(Biot)-NH <sub>2</sub>                         | H3K4me3 + K9ac + K14ac                         |
| 23        | H3 1-20 ARTK(Me <sub>3</sub> )QTARK(Ac)STGGKAPRK(Ac)QL-K(Biot)-NH <sub>2</sub>                         | H3K4me3 + K9ac + K18ac                         |
| 24        | H3 1-20 ARTK(Me <sub>3</sub> )QTARKSTGGK(Ac)APRK(Ac)QL-K(Biot)-NH <sub>2</sub>                         | H3K4me3 + K14ac + K18ac                        |
| 25        | H3 1-20 ARTK(Me <sub>3</sub> )QTARK(Ac)STGGK(Ac)APRK(Ac)QL-K(Biot)-NH <sub>2</sub>                     | H3K4me3 + K9ac + K14ac + K18ac                 |
| 26        | H3 1-20 ARpTK(Me <sub>3</sub> )QTARK(Ac)STGGK(Ac)APRK(Ac)QL-K(Biot)-NH <sub>2</sub>                    | H3T3p + K4me3 + K9ac + K14ac + K18ac           |
| 27        | H3 1-20 ARpTK(Me <sub>3</sub> )QTARKSTGGKAPRKQL-K(Biot)-NH <sub>2</sub>                                | H3T3p + K4me3                                  |
| 28        | H3 1-20 AR(Me <sub>2</sub> a)pTK(Me <sub>3</sub> )QTARK(Ac)STGGK(Ac)APRK(Ac)QL-K(Biot)-NH <sub>2</sub> | H3R2me2a + T3p + K4me3 + K9ac + K14ac + K18ac  |
| 29        | H3 1-20 AR(Me <sub>2</sub> a)pTK(Me <sub>3</sub> )QTARKSTGGKAPRKQL-K(Biot)-NH <sub>2</sub>             | H3R2me2a + T3p + K4me3                         |
| 30        | H3 1-20 AR(Me <sub>2</sub> a)TK(Me <sub>3</sub> )QTARKSTGGKAPRKQL-K(Biot)-NH <sub>2</sub>              | H3R2me2a + K4me3                               |
| 32        | H3 1-20 ARTK(Me <sub>2</sub> )QTARKSTGGKAPRKQL-K(Biot)-NH <sub>2</sub>                                 | H3K4me2                                        |
| 33        | H3 1-20 ARTK(Me <sub>2</sub> )QTARK(Ac)STGGK(Ac)APRK(Ac)QL-K(Biot)-NH <sub>2</sub>                     | H3K4me2 + K9ac + K14ac + K18ac                 |
| 34        | H3 1-20 ARTK(Me)QTARKSTGGKAPRKQL-K(Biot)-NH <sub>2</sub>                                               | H3K4me1                                        |
| 35        | H3 1-20 ARTK(Me)QTARK(Ac)STGGK(Ac)APRK(Ac)QL-K(Biot)-NH <sub>2</sub>                                   | H3K4me1 + K9ac + K14ac + K18ac                 |
| 36        | H3 1-20 ARTKQTARKpSTGGKAPRKQL-K(Biot)-NH <sub>2</sub>                                                  | H3S10p                                         |
| 37        | H3 1-20 ARTK(Ac)QTARK(Ac)pSTGGK(Ac)APRK(Ac)QL-K(Biot)-NH <sub>2</sub>                                  | H3K4ac + K9ac + S10p + K14ac + K18ac           |
| 38        | H3 1-20 ARTK(Me <sub>3</sub> )QTARKpSTGGKAPRKQL-K(Biot)-NH <sub>2</sub>                                | H3K4me3 + S10p                                 |
| 39        | H3 1-20 ARTK(Me <sub>3</sub> )QTARK(Ac)pSTGGK(Ac)APRK(Ac)QL-K(Biot)-NH <sub>2</sub>                    | H3K4me3 + K9ac + S10p + K14ac + K18ac          |
| 40        | H3 1-20 AR(Me <sub>2</sub> a)TK(Me <sub>3</sub> )QTARKpSTGGKAPRKQL-K(Biot)-NH <sub>2</sub>             | H3R2me2a + K4me3 + S10p                        |
| 41        | H3 1-20 AR(Me <sub>2</sub> a)TK(Me <sub>3</sub> )QTARK(Ac)pSTGGK(Ac)APRK(Ac)QL-K(Biot)-NH <sub>2</sub> | H3R2me2a + K4me3 + K9ac + S10p + K14ac + K18ac |
| 42        | H3 1-20 ARTKQTARK(Me <sub>3</sub> )STGGKAPRKQL-K(Biot)-NH <sub>2</sub>                                 | H3K9me3                                        |
| 43        | H3 1-20 ARTK(Ac)QTARK(Me <sub>3</sub> )STGGK(Ac)APRK(Ac)QL-K(Biot)-NH <sub>2</sub>                     | H3K4ac + K9me3 + K14ac + K18ac                 |
| 44        | H3 1-20 ARTK(Me <sub>2</sub> )QTARK(Ac)STGGKAPRK(Ac)QL-K(Biot)-NH <sub>2</sub>                         | H3K4me2 + K9ac + K18ac                         |

|     |          |                                                                                                     |                                         |
|-----|----------|-----------------------------------------------------------------------------------------------------|-----------------------------------------|
| 45  | H3 1-20  | ARTK(Me)QTARK(Ac)STGGKAPRK(Ac)QL-K(Biot)-NH <sub>2</sub>                                            | H3K4me1 + K9ac + K18ac                  |
| 47  | H3 1-20  | AR(Me <sub>2</sub> a)TKQTARKSTGGKAPRKQL-K(Biot)-NH <sub>2</sub>                                     | H3R2me2a                                |
| 48  | H3 1-20  | AR(Me <sub>2</sub> a)TK(Ac)QTARK(Ac)STGGK(Ac)APRK(Ac)QL-K(Biot)-NH <sub>2</sub>                     | H3R2me2a + K4ac + K9ac + K14ac + K18ac  |
| 50  | H3 1-20  | AR(Me <sub>2</sub> a)TK(Me <sub>3</sub> )QTARK(Ac)STGGK(Ac)APRK(Ac)QL-K(Biot)-NH <sub>2</sub>       | H3R2me2a + K4me3 + K9ac + K14ac + K18ac |
| 51  | H3 1-20  | AR(Me)TK(Me <sub>3</sub> )QTARKSTGGKAPRKQL-K(Biot)-NH <sub>2</sub>                                  | H3R2me1 + K4me3                         |
| 52  | H3 1-20  | AR(Me)TK(Me <sub>3</sub> )QTARK(Ac)STGGK(Ac)APRK(Ac)QL-K(Biot)-NH <sub>2</sub>                      | H3R2me1 + K4me3 + K9ac + K14ac + K18ac  |
| 53  | H3 1-20  | ACitTKQTARKSTGGKAPRKQL-K(Biot)-NH <sub>2</sub>                                                      | H3Cit2                                  |
| 54  | H3 1-20  | ACitTK(Me <sub>3</sub> )QTARKSTGGKAPRKQL-K(Biot)-NH <sub>2</sub>                                    | H3Cit2 + K4me3                          |
| 55  | H3 1-20  | ACitTK(Me <sub>3</sub> )QTARK(Ac)STGGK(Ac)APRK(Ac)QL-K(Biot)-NH <sub>2</sub>                        | H3Cit2 + K4me3 + K9ac + K14ac + K18ac   |
| 56  | H3 1-20  | ACitTK(Ac)QTARK(Ac)STGGK(Ac)APRK(Ac)QL-K(Biot)-NH <sub>2</sub>                                      | H3Cit2 + K4ac + K9ac + K14ac + K18ac    |
| 57  | H3 1-20  | ARpTKQTARKSTGGKAPRKQL-Peg-K(Biot)-NH <sub>2</sub>                                                   | H3T3p                                   |
| 58  | H4 1-23  | Ac-SGRGKGGKGLGKGGAKRHRKVLR-Peg-Biot                                                                 | H4 (1-23)                               |
| 59  | H4 1-23  | Ac-SGRGK(Ac)GGK(Ac)GLGK(Ac)GGAK(Ac)RHRKVLR-Peg-Biot                                                 | H4K5ac + K8ac + K12ac + K16ac           |
| 60  | H3 1-20  | AR(Me <sub>2</sub> a)TK(Me <sub>2</sub> )QTARKSTGGKAPRKQL-K(Biot)-NH <sub>2</sub>                   | H3R2me2a + K4me2                        |
| 61  | H3 1-20  | AR(Me <sub>2</sub> s)TK(Me <sub>2</sub> )QTARKSTGGKAPRKQL-K(Biot)-NH <sub>2</sub>                   | H3R2me2s + K4me2                        |
| 62  | H3 1-20  | AR(Me)TK(Me <sub>2</sub> )QTARKSTGGKAPRKQL-K(Biot)-NH <sub>2</sub>                                  | H3R2me1 + K4me2                         |
| 63  | H3 1-20  | ACitTK(Me <sub>2</sub> )QTARKSTGGKAPRKQL-K(Biot)-NH <sub>2</sub>                                    | H3Cit2 + K4me2                          |
| 66  | H4 1-23  | Ac-SGRGK(Ac)GGKGLGKGGAKRHRKVLR-Peg-Biot                                                             | H4K5ac                                  |
| 67  | H4 1-23  | Ac-SGRGKGGK(Ac)GLGKGGAKRHRKVLR-Peg-Biot                                                             | H4K8ac                                  |
| 68  | H4 1-23  | Ac-SGRGKGGKGLGK(Ac)GGAKRHRKVLR-Peg-Biot                                                             | H4K12ac                                 |
| 69  | H4 1-23  | Ac-SGRGKGGKGLGKGGAK(Ac)RHRKVLR-Peg-Biot                                                             | H4K16ac                                 |
| 70  | H4 1-23  | Ac-SGRGK(Ac)GGKGLGK(Ac)GGAKRHRKVLR-Peg-Biot                                                         | H4K5ac + K12ac                          |
| 71  | H4 1-23  | Ac-SGRGKGGK(Ac)GLGKGGAK(Ac)RHRKVLR-Peg-Biot                                                         | H4K8ac + K16ac                          |
| 72  | H4 1-23  | Ac-SGRGK(Ac)GGK(Ac)GLGK(Ac)GGAKRHRKVLR-Peg-Biot                                                     | H4K5ac + K8ac + K12ac                   |
| 73  | H4 1-23  | Ac-SGR(Me <sub>2</sub> a)GKGGKGLGKGGAKRHRKVLR-K(Biot)-NH <sub>2</sub>                               | H4R3me2a                                |
| 74  | H4 1-23  | Ac-SGR(Me <sub>2</sub> s)GKGGKGLGKGGAKRHRKVLR-K(Biot)-NH <sub>2</sub>                               | H4R3me2s                                |
| 75  | H4 1-23  | Ac-SGR(Me)GKGGKGLGKGGAKRHRKVLR-K(Biot)-NH <sub>2</sub>                                              | H4R3me1                                 |
| 76  | H4 1-23  | Ac-pSGR(Me <sub>2</sub> a)GKGGKGLGKGGAKRHRKVLR-K(Biot)-NH <sub>2</sub>                              | H4S1p + R3me2a                          |
| 77  | H4 1-23  | Ac-pSGR(Me <sub>2</sub> s)GKGGKGLGKGGAKRHRKVLR-K(Biot)-NH <sub>2</sub>                              | H4S1p + R3me2s                          |
| 78  | H4 1-23  | Ac-pSGR(Me)GKGGKGLGKGGAKRHRKVLR-K(Biot)-NH <sub>2</sub>                                             | H4S1p + R3me1                           |
| 89  | H3 1-20  | ARTK(Me <sub>3</sub> )QTAR(Me <sub>2</sub> s)K(Me <sub>3</sub> )STGGKAPRKQL-K(Biot)-NH <sub>2</sub> | H3K4me3 + R8me2s + K9me3                |
| 90  | H3 15-43 | Ac-APRKQLATKAARKSAPSTGGVKKPHRYGGK(Biot)-NH <sub>2</sub>                                             | H3 (15-41)                              |
| 91  | H3 15-43 | Ac-APRK(Me <sub>3</sub> )QLATKAARKSAPSTGGVKKPHRY-GG-K(Biot)-NH <sub>2</sub>                         | H3K18me3                                |
| 93  | H3 15-43 | Ac-APRKQLATKAARKSAPSTGGVK(Me <sub>3</sub> )KPHRY-GG-K(Biot)-NH <sub>2</sub>                         | H3K36me3                                |
| 95  | H3 15-43 | Ac-APRK(Me <sub>3</sub> )QLATKAARKSAPSTGGVK(Me <sub>3</sub> )KPHRY-GG-K(Biot)-NH <sub>2</sub>       | H3K18me3 + K36me3                       |
| 100 | H3 74-84 | Ac-IAQDFKTDLRF-Peg-K(Biot)-NH <sub>2</sub>                                                          | H3 (74-84) N-ac                         |
| 101 | H3 74-84 | Ac-IAQDFK(Me <sub>3</sub> )TDLRF-Peg-K(Biot)-NH <sub>2</sub>                                        | H3K79me3                                |
| 102 | H3 74-84 | Ac-IAQDFK(Me <sub>2</sub> )TDLRF-Peg-K(Biot)-NH <sub>2</sub>                                        | H3K79me2                                |
| 103 | H3 74-84 | Ac-IAQDFK(Me)TDLRF-Peg-K(Biot)-NH <sub>2</sub>                                                      | H3K79me1                                |
| 104 | H3 74-84 | IAQDFKTDLRF-Peg-K(Biot)-NH <sub>2</sub>                                                             | H3 (74-84)                              |
| 121 | H3 27-45 | KSAPSTGGVK(Me <sub>2</sub> )KPHRYKPGT-GG-K(Biot)-NH <sub>2</sub>                                    | H3K36me2                                |
| 123 | H3 27-45 | KSAPSTGGVK(Ac)KPHRYKPGT-GG-K(Biot)-NH <sub>2</sub>                                                  | H3K36ac                                 |
| 124 | H3 27-45 | KSAPSTGGVKKPHRYKPGT-GG-K(Biot)-NH <sub>2</sub>                                                      | H3 (27-45)                              |
| 132 | H3 1-20  | ARTK(Me <sub>3</sub> )QTARK(Me <sub>3</sub> )STGGKAPRKQL-K(Biot)-NH <sub>2</sub>                    | H3K4me3 + K9me3                         |
| 133 | H3 1-20  | ARTKQTARK(Me <sub>2</sub> )STGGKAPRKQL-K(Biot)-NH <sub>2</sub>                                      | H3K9me2                                 |
| 134 | H3 1-20  | ARTKQTARK(Me)STGGKAPRKQL-K(Biot)-NH <sub>2</sub>                                                    | H3K9me1                                 |
| 137 | H3 1-20  | ARTKQTARKSTGGKAPRK(Me <sub>3</sub> )QL-K(Biot)-NH <sub>2</sub>                                      | H3K18me3                                |
| 138 | H3 1-20  | ARTKQTARKSTGGKAPRK(Me <sub>2</sub> )QL-K(Biot)-NH <sub>2</sub>                                      | H3K18me2                                |

|     |          |                                                                                                                        |                                          |
|-----|----------|------------------------------------------------------------------------------------------------------------------------|------------------------------------------|
| 139 | H3 1-20  | ARTKQTARK <b>STGGK</b> APRK( <b>Me</b> )QL-K(Biot)-NH <sub>2</sub>                                                     | H3K18me1                                 |
| 144 | H3 1-20  | ARTKQTARK( <b>Ac</b> )p <b>STGGK</b> APRKQL-K(Biot)-NH <sub>2</sub>                                                    | H3K9ac + S10p                            |
| 145 | H3 1-20  | ARTKQTARK( <b>Me<sub>3</sub></b> )p <b>STGGK</b> APRKQL-K(Biot)-NH <sub>2</sub>                                        | H3K9me3 + S10p                           |
| 146 | H3 1-20  | ARTKQTARK( <b>Me<sub>2</sub></b> )p <b>STGGK</b> APRKQL-K(Biot)-NH <sub>2</sub>                                        | H3K9me2 + S10p                           |
| 147 | H3 1-20  | ARTKQTARK( <b>Me</b> )p <b>STGGK</b> APRKQL-K(Biot)-NH <sub>2</sub>                                                    | H3K9me1 + S10p                           |
| 148 | H3 1-20  | ARTK( <b>Me<sub>3</sub></b> )QTARK( <b>Ac</b> )p <b>STGGK</b> APRKQL-K(Biot)-NH <sub>2</sub>                           | H3K4me3 + K9ac + S10p                    |
| 157 | H3 1-20  | AR( <b>Me<sub>2</sub>s</b> )TK( <b>Me<sub>3</sub></b> )QTARK <b>STGGK</b> APRKQL-K(Biot)-NH <sub>2</sub>               | H3R2me2s + K4me3                         |
| 162 | H3 1-20  | ARTKQpTARK <b>STGGK</b> APRKQL-K(Biot)-NH <sub>2</sub>                                                                 | H3T6p                                    |
| 163 | H3 1-20  | ARTK( <b>Me<sub>3</sub></b> )QpTARK <b>STGGK</b> APRKQL-K(Biot)-NH <sub>2</sub>                                        | H3K4me3 + T6p                            |
| 164 | H3 1-20  | ARTK( <b>Me<sub>2</sub></b> )QpTARK <b>STGGK</b> APRKQL-K(Biot)-NH <sub>2</sub>                                        | H3K4me2 + T6p                            |
| 165 | H3 1-20  | ARTKQpTARK( <b>Ac</b> ) <b>STGGK</b> ( <b>Ac</b> )APRK( <b>Ac</b> )QL-K(Biot)-NH <sub>2</sub>                          | H3T6p + K9ac + K14ac + K18ac             |
| 166 | H3 1-20  | ARTK( <b>Me<sub>3</sub></b> )QpTARK( <b>Ac</b> ) <b>STGGK</b> ( <b>Ac</b> )APRK( <b>Ac</b> )QL-K(Biot)-NH <sub>2</sub> | H3K4me3 + T6p + K9ac + K14ac + K18ac     |
| 167 | H3 1-20  | ARTK( <b>Me<sub>2</sub></b> )QpTARK( <b>Ac</b> ) <b>STGGK</b> ( <b>Ac</b> )APRK( <b>Ac</b> )QL-K(Biot)-NH <sub>2</sub> | H3K4me2 + T6p + K9ac + K14ac + K18ac     |
| 178 | H3 1-20  | ARTKQTAR( <b>Me</b> )K( <b>Me<sub>3</sub></b> ) <b>STGGK</b> APRKQL-K(Biot)-NH <sub>2</sub>                            | H3R8me1 + K9me3                          |
| 179 | H3 1-20  | ARTKQTAR( <b>Me</b> )K( <b>Me<sub>2</sub></b> ) <b>STGGK</b> APRKQL-K(Biot)-NH <sub>2</sub>                            | H3R8me1 + K9me2                          |
| 180 | H3 1-20  | ARTKQTAR( <b>Me<sub>2</sub>a</b> )K( <b>Me<sub>3</sub></b> ) <b>STGGK</b> APRKQL-K(Biot)-NH <sub>2</sub>               | H3R8me2a + K9me3                         |
| 181 | H3 1-20  | ARTKQTAR( <b>Me<sub>2</sub>a</b> )K( <b>Me<sub>2</sub></b> ) <b>STGGK</b> APRKQL-K(Biot)-NH <sub>2</sub>               | H3R8me2a + K9me2                         |
| 182 | H3 1-20  | ARTKQTAR( <b>Me<sub>2</sub>a</b> )K( <b>Me</b> ) <b>STGGK</b> APRKQL-K(Biot)-NH <sub>2</sub>                           | H3R8me2a + K9me1                         |
| 183 | H3 1-20  | ARTKQTAR( <b>Me<sub>2</sub>s</b> )K( <b>Me<sub>3</sub></b> ) <b>STGGK</b> APRKQL-K(Biot)-NH <sub>2</sub>               | H3R8me2s + K9me3                         |
| 184 | H3 1-20  | ARTKQTAR( <b>Me<sub>2</sub>s</b> )K( <b>Me<sub>2</sub></b> ) <b>STGGK</b> APRKQL-K(Biot)-NH <sub>2</sub>               | H3R8me2s + K9me2                         |
| 185 | H3 1-20  | ARTKQTAR( <b>Me<sub>2</sub>s</b> )K( <b>Me</b> ) <b>STGGK</b> APRKQL-K(Biot)-NH <sub>2</sub>                           | H3R8me2s + K9me1                         |
| 186 | H3 1-20  | ARTK( <b>Ac</b> )QTARK( <b>Me<sub>2</sub></b> ) <b>STGGK</b> ( <b>Ac</b> )APRK( <b>Ac</b> )QL-K(Biot)-NH <sub>2</sub>  | H3K4ac + K9me2 + K14ac + K18ac           |
| 187 | H3 1-20  | ARTK( <b>Ac</b> )QTARK( <b>Me</b> ) <b>STGGK</b> ( <b>Ac</b> )APRK( <b>Ac</b> )QL-K(Biot)-NH <sub>2</sub>              | H3K4ac + K9me1 + K14ac + K18ac           |
| 195 | H3 15-34 | Ac-APRKQLATKAARK( <b>Me<sub>3</sub></b> )SAPSTGG-Peg-Biot                                                              | H3K27me3                                 |
| 196 | H3 15-34 | Ac-APRKQLATKAARK( <b>Me<sub>2</sub></b> )SAPSTGG-Peg-Biot                                                              | H3K27me2                                 |
| 197 | H3 15-34 | Ac-APRKQLATKAARK( <b>Me</b> )SAPSTGG-Peg-Biot                                                                          | H3K27me1                                 |
| 220 | H3 1-20  | ARTKQpTARK( <b>Me<sub>3</sub></b> ) <b>STGGK</b> APRKQL-K(Biot)-NH <sub>2</sub>                                        | H3T6p + K9me3                            |
| 300 | H2A 1-17 | Ac-SGRGKQGGKARAKAKTR-Peg-Biot                                                                                          | H2A (1-17)                               |
| 301 | H2A 1-17 | Ac-SGRGK( <b>Ac</b> )QGGK( <b>Ac</b> )ARAK( <b>Ac</b> )AK( <b>Ac</b> )TR-Peg-Biot                                      | H2AK5ac + K9ac + K13ac + K15ac           |
| 302 | H2A 1-17 | Ac-SGRGK( <b>Ac</b> )QGGKARAKAKTR-Peg-Biot                                                                             | H2AK5ac                                  |
| 303 | H2A 1-17 | Ac-pSGRGK( <b>Ac</b> )QGGKARAKAKTR-Peg-Biot                                                                            | H2AS1p + K5ac                            |
| 304 | H2A 1-17 | Ac-SGR( <b>Me<sub>2</sub>a</b> )GK( <b>Ac</b> )QGGKARAKAKTR-Peg-Biot                                                   | H2AR3me2a + K5ac                         |
| 305 | H2A 1-17 | Ac-pSGR( <b>Me<sub>2</sub>a</b> )GK( <b>Ac</b> )QGGKARAKAKTR-Peg-Biot                                                  | H2AS1p + R3me2a + K5ac                   |
| 306 | H2A 1-17 | Ac-SGCitGK( <b>Ac</b> )QGGKARAKAKTR-Peg-Biot                                                                           | H2ACit3 + K5ac                           |
| 307 | H2A 1-17 | Ac-pSGCitGK( <b>Ac</b> )QGGKARAKAKTR-Peg-Biot                                                                          | H2AS1p + Cit3 + K5ac                     |
| 308 | H2A 1-17 | Ac-pSGRGK( <b>Ac</b> )QGGK( <b>Ac</b> )ARAK( <b>Ac</b> )AK( <b>Ac</b> )TR-Peg-Biot                                     | H2AS1p + K5ac + K9ac + K13ac + K15ac     |
| 309 | H2A 1-17 | SGRGK( <b>Ac</b> )QGGK( <b>Ac</b> )ARAK( <b>Ac</b> )AK( <b>Ac</b> )TR-Peg-Biot                                         | H2AK5ac + K9ac + K13ac + K15ac (no N-ac) |
| 400 | H2B 1-24 | PEPAKSAPAPKKGSKKAVTKAQKK-Peg-Biot                                                                                      | H2B (1-24)                               |
| 401 | H2B 1-24 | PEPAK( <b>Me<sub>3</sub></b> )SAPAPKKGSKKAVTKAQKK-Peg-Biot                                                             | H2BK5me3                                 |
| 402 | H2B 1-24 | PEPAK( <b>Me<sub>2</sub></b> )SAPAPKKGSKKAVTKAQKK-Peg-Biot                                                             | H2BK5me2                                 |
| 403 | H2B 1-24 | PEPAK( <b>Me</b> )SAPAPKKGSKKAVTKAQKK-Peg-Biot                                                                         | H2BK5me1                                 |
